# Supplementary material for: Structure analysis of a BEC-type germanosilicate zeolite including the location of the flexible organic cations in the channels
Source: Royal Society of Chemistry journal article supplement (doi:10.1039/c5ce00731c), 2015-01-01
Supplement: c5ce00731c2.pdf [file c5ce00731c2.pdf]

## Supporting Information for Structure analysis of a BEC-type germanosilicate zeolite including the location of the flexible organic cations in the channels

S. Smeets,<sup>a</sup> L. Koch,<sup>a</sup> N. Mascello,<sup>a</sup> J. Sesseg,<sup>a</sup> L. B. McCusker,<sup>\*a</sup> M. Hernández-Rodríguez,<sup>b</sup> S. Mitchell,<sup>b</sup> and J. Pérez-Ramirez<sup>b</sup>

<sup>a</sup>Laboratory of Crystallography, ETH Zurich, Switzerland

<sup>b</sup>Institute for Chemical and Bioengineering, D-CHAB, ETH Zurich, CH-8093 Zurich, Switzerland.

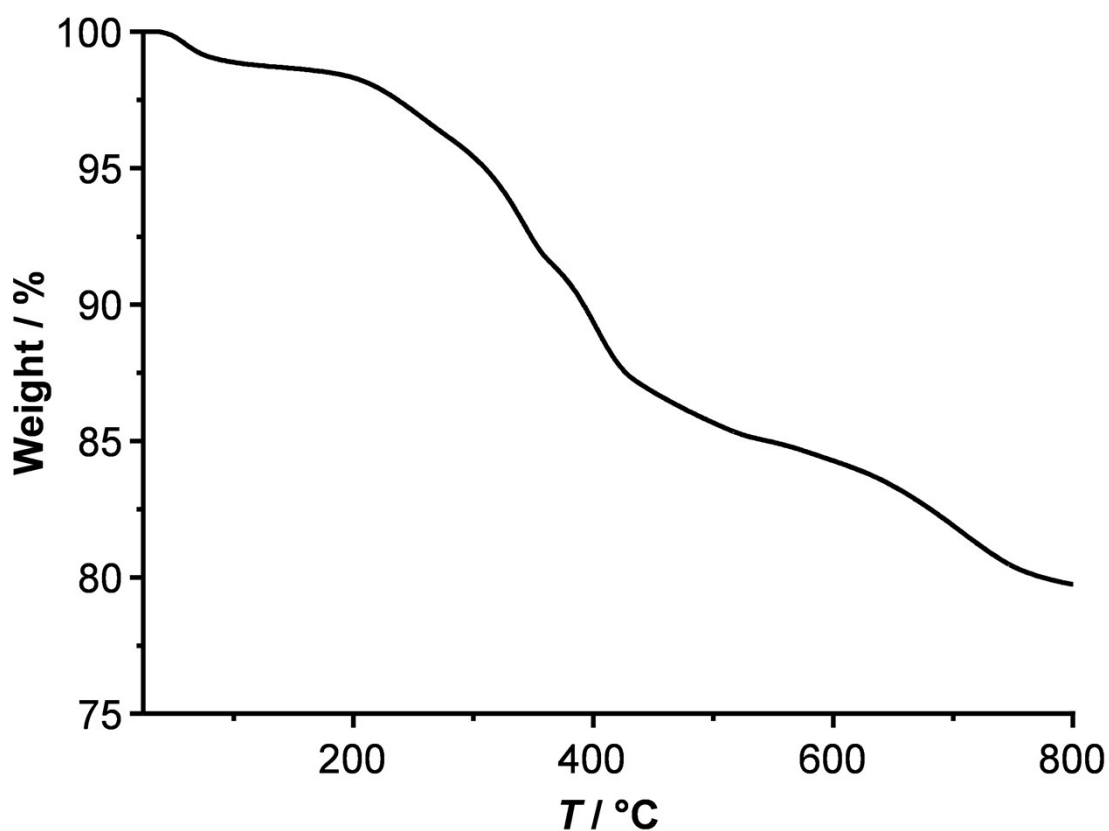

**Figure S1.** Thermogravimetric profile of the as-made Ge-BEC zeolite. The weight loss below 100°C corresponds to physisorbed water, the total organic content was calculated from the weight loss between 100 and 550°C.

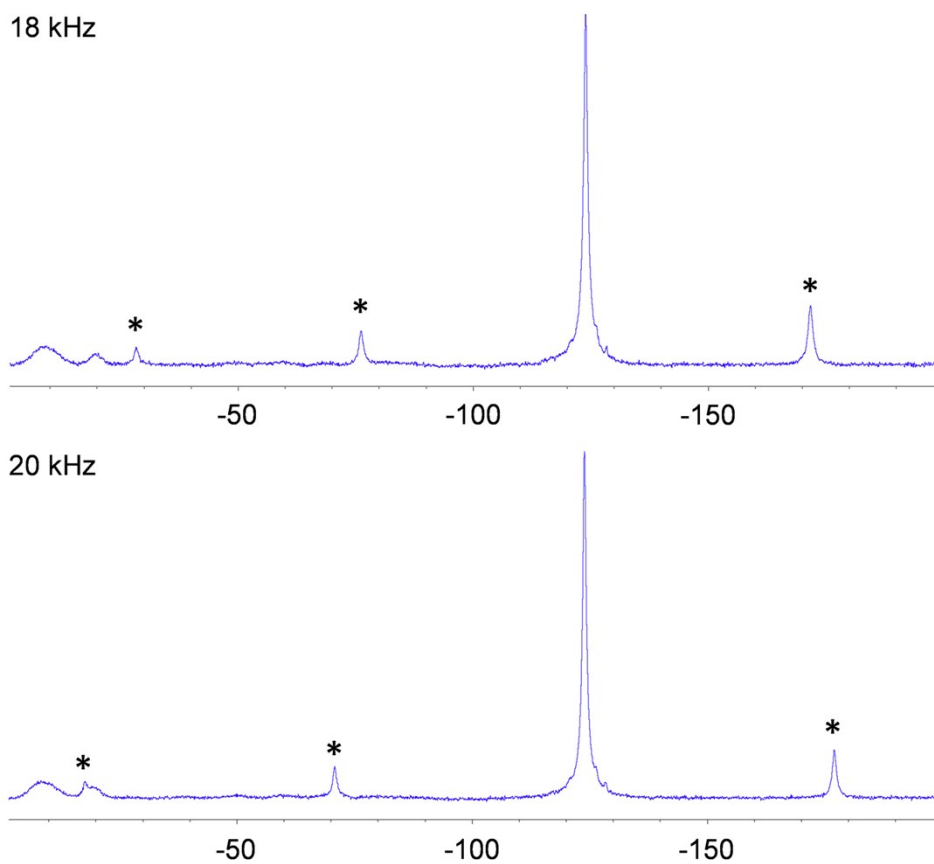

**Figure S2.**  $^{19}\text{F}$  spectra of the as-made Ge-BEC acquired at different spinning rates. The spinning side bands marked with a star are clearly identified by their positional shifts as a function of spinning rate and by their sharpness, which reflects the shape of the intense band associated with  $\text{SiF}_6^{2-}$  species at -123 ppm.
